# Supplementary material for: Automatic Evaluation for Bioengineering of Human Artificial Ovary: A Model for Fertility Preservation for Prepubertal Female Patients with a Malignant Tumor
Source: MDPI journal article supplement (doi:10.3390/ijms232012419), 2022-10-17
Supplement: s1 [file s1]

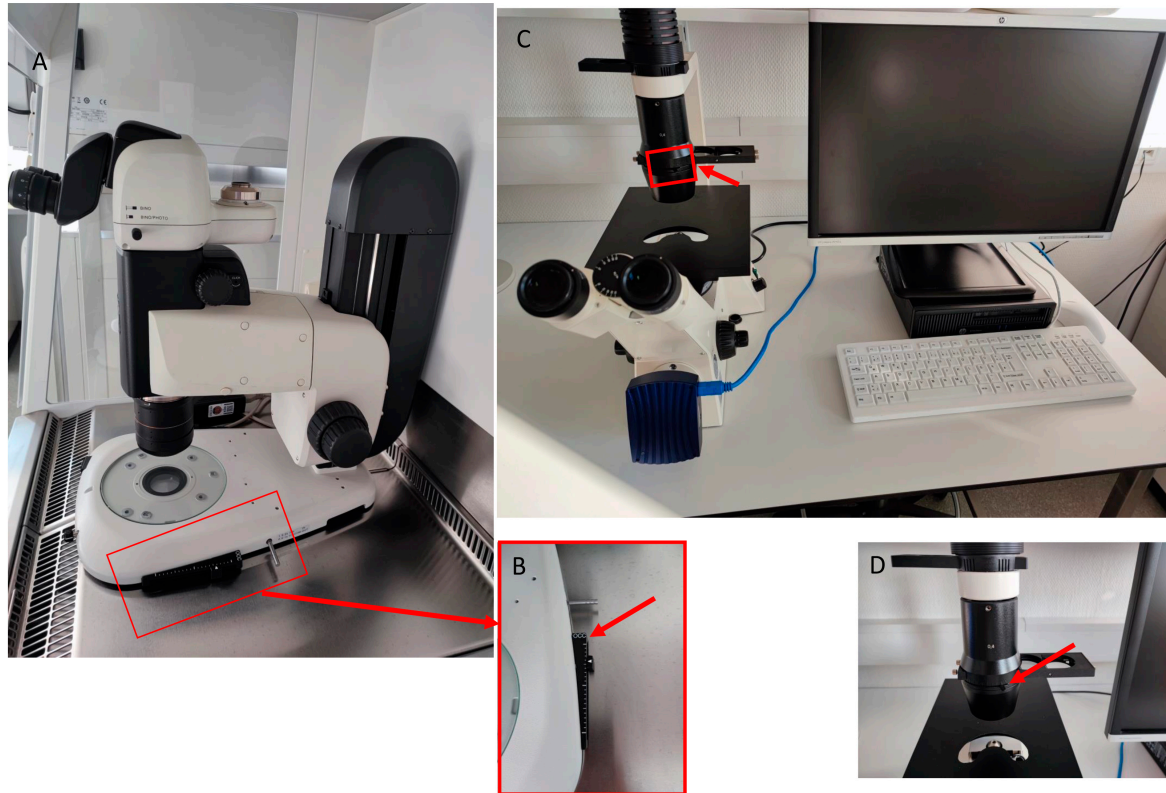

**Figure S1.** Optical microscope setup parameters. (A). Nikon SMZ18 Stereoscope setup in oblique coherent contrast (OCC) mode; (B). detailed setup of stereoscope under OCC illumination: the arrow shows the exact scales on the slide lever for perfect bright field imaging; (C). Zeiss Axiovert 40CFL microscope setup using phase contrast (Ph) mode; (D). detailed position of the aperture under Ph0.4 mode. The supplementary video is an example of a 3D view of the artificial ovary stained with RedDot.
